# Supplementary material for: Fe–N bonding in a carbon nanotube–graphene complex for oxygen reduction: an XAS study
Source: Royal Society of Chemistry journal article supplement (doi:10.1039/c4cp01455c), 2014-06-18
Supplement: c4cp01455c1.pdf [file c4cp01455c1.pdf]

## Supplemental Material for

# The Fe-N bonding in a carbon nanotube-graphene complex for oxygen reduction: an XAS study

Jigang Zhou<sup>a,b\*</sup>, Paul N. Duchesne<sup>c</sup>, Yongfeng Hu<sup>a</sup>, Jian Wang<sup>a</sup>, Peng Zhang<sup>c</sup>, Yanguang Li<sup>d</sup>, Tom Regier<sup>a</sup>, and Hongjie Dai<sup>d</sup>

<sup>a</sup> Canadian Light Source Inc, Saskatoon, Canada. Fax: 1-306-6573535; Tel: 1-306-657-3587; E-mail: jigang.zhou@lightsource.ca

<sup>b</sup> School of chemical engineering, Harbin Institute of Technology, China

<sup>c</sup> Department of chemistry, Dalhousie University, Halifax, Canada

<sup>d</sup> Department of chemistry, Stanford University, Stanford, USA

### 1. XANES

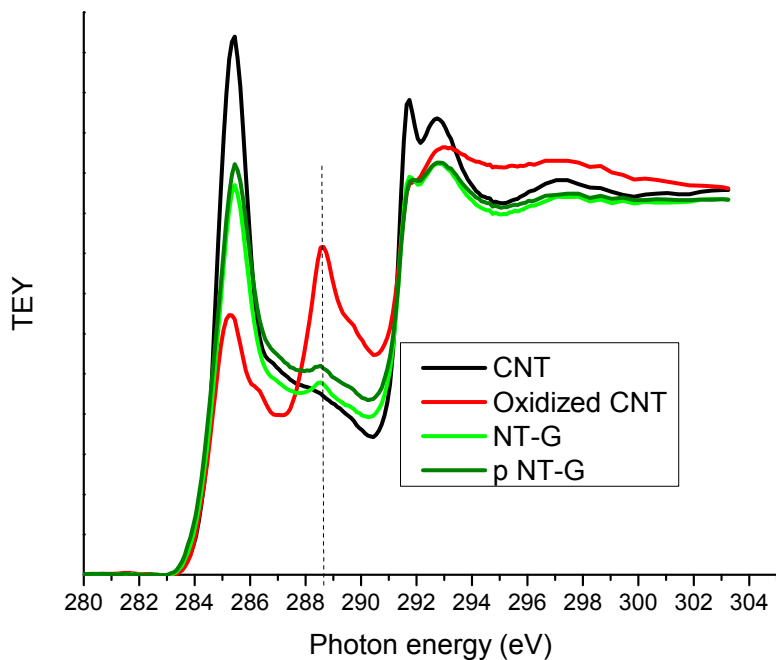

Support Fig.1: C K-edge XANES of NT-G, p NT-G and CNT are compared with oxidized CNT before annealing. The same position of C-O feature in NT-G and p NT-G relative to carboxyl C-O feature in oxidized CNT highlights the similarity between them.

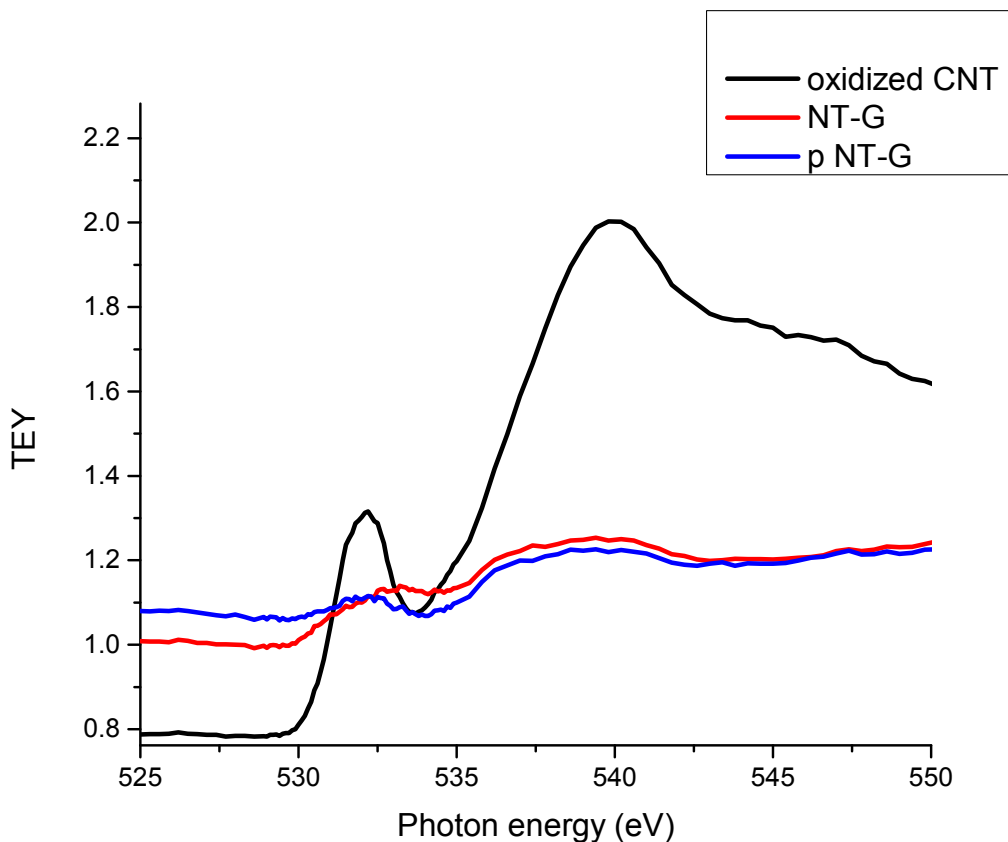

Support Fig.2 : O K-edge XANES of NT-G, p NT-G and oxidized CNT. O conetration is much lower in NT-G and p NT-G. the peak at ~532 eV in NT-G and p NT-G then can be assigned to carboxylic feature as that in oxidized CNT.

Table 1 peak position at Fe L-edge XANES

|             | 1      | 3    | 4      |
|-------------|--------|------|--------|
| FePc        | ~706.9 | 708  | 709.3  |
| FePC ref 11 | ~707   | ~708 | ~709.2 |
| FePc ref12  | ~707   | ~708 | ~709.2 |

## 2. EXAFS

Experimental EXAFS plots were obtained using WinXAS software (Ressler, T. J. *Synchrotron Radiat.* **1998**, 5, 118–122) by applying a Fourier Transform to the data between 2.5 and 12.5 Å<sup>-1</sup> for each absorption spectrum. Fitting was performed based on FEFF modeling within a specific region of interest for each sample (Fe<sub>2</sub>O<sub>3</sub>: 1.0 – 2.75 Å, FePc: 1.0 – 3.0 Å, CNT: 1.3 – 2.6 Å, and NT-G: 1.4 – 2.55 Å). Uncertainties were determined by weighting the off-diagonal elements of the correlation matrix by the reduced  $\chi^2$  value of the fit, as recommended by Newville *et al.* (Newville, M.; Boyanov, B. I.; Sayers, D. E. *J. Synchrotron Radiat.* **1999**, 6, 264–265). Details specific to the fitting of each particular sample are presented below.

*Fe<sub>2</sub>O<sub>3</sub>*: This (bulk) material was selected for determination of the  $S_0^2$  parameter value used in all subsequent fits because of its relatively simple and well-known structure ; in addition to the use of a single  $E_0$  shift value , by correlating the Debye-Waller ( $\sigma^2$ ) parameter values of the Fe–O scattering paths and constraining the sum of their total coordination numbers (CNs) to 5 atoms (based on crystallographic data), an  $S_0^2$  value of  $0.9 \pm 0.1$  was obtained. The remaining parameter values were then determined by fixing this value and removing the previous CN constraints.

*FePc*: Due to the purity of the FePc material, CNs for the nearest-neighbour Fe–N and Fe–C paths could be fixed to known values. It was also necessary to fix  $\sigma^2$  values for the Fe–N and Fe–O scattering paths in order to obtain a good fit to the experimental data.

*CNT*: A single E0 shift value was used during fitting, and the  $\sigma^2$  value for the Fe–N/O path was fixed to match that determined from fitting of the NT-G sample.

*NT-G*: No additional constraints or correlations were used in fitting the NT-G sample data.

| Sample | Path   | CN     | R / Å    | $\sigma^2 / \text{Å}^2$ | $\Delta E_0 / \text{eV}$ |
|--------|--------|--------|----------|-------------------------|--------------------------|
| CNT    | Fe-C   | 1.4(5) | 1.97(7)  | 0.007**                 | -2(2)                    |
|        | Fe-Fe  | 5(1)   | 2.52(1)  | 0.010(3)                |                          |
| NT-G   | Fe-N/O | 3.3(3) | 1.994(9) | 0.007(1)                | 4(1)                     |
|        | Fe-Fe  | 2.5(3) | 2.514(7) | 0.006(1)                | -2(1)                    |
| FePc   | Fe-N   | 4      | 1.92(2)  | 0.001                   | 4(5)                     |
|        | Fe-O   | 1.8(7) | 2.11(4)  | 0.001                   | 14(6)                    |
|        | Fe-C   | 8      | 2.89(5)  | 0.005(4)                | -4(5)                    |

\* CN = Coordination number, R = Bond length,  $\sigma^2$  = Debye-Waller factor,  $\Delta E_0 = E_0$  shift.

\*\* This value was fixed based on the Fe-N/O scattering path in the NT-G sample in order to obtain the best possible fit to the experimental data.

Support table 2: EXAFS fitting results
